# Supplementary material
Source: publisher figshare collection journal article supplement (https://acs.figshare.com/ndownloader/files/5882262)
Supplement: Supplementary file 1 [file 5882262]

# om020533b.cif

data_1196syls (OM020533B)

_audit_creation_method            SHELXL-97
_chemical_name_systematic
;
 ?
;
_chemical_name_common             ?
_chemical_melting_point           ?
_chemical_formula_moiety          C21 H38 B N2 Rh
_chemical_formula_sum
 'C21 H38 B N2 Rh'
_chemical_formula_weight          432.25

loop_
 _atom_type_symbol
 _atom_type_description
 _atom_type_scat_dispersion_real
 _atom_type_scat_dispersion_imag
 _atom_type_scat_source
 'C'  'C'   0.0033   0.0016
 'International Tables Vol C Tables 4.2.6.8 and 6.1.1.4'
 'H'  'H'   0.0000   0.0000
 'International Tables Vol C Tables 4.2.6.8 and 6.1.1.4'
 'B'  'B'   0.0013   0.0007
 'International Tables Vol C Tables 4.2.6.8 and 6.1.1.4'
 'N'  'N'   0.0061   0.0033
 'International Tables Vol C Tables 4.2.6.8 and 6.1.1.4'
 'Rh'  'Rh'  -1.1178   0.9187
 'International Tables Vol C Tables 4.2.6.8 and 6.1.1.4'

_symmetry_cell_setting            Monoclinic
_symmetry_space_group_name_H-M    P2(1)/c

loop_
 _symmetry_equiv_pos_as_xyz
 'x, y, z'
 '-x, y+1/2, -z+1/2'
 '-x, -y, -z'
 'x, -y-1/2, z-1/2'

_cell_length_a                    10.4114(6)
_cell_length_b                    13.3264(8)
_cell_length_c                    15.7688(9)
_cell_angle_alpha                 90.00
_cell_angle_beta                  105.8360(10)
_cell_angle_gamma                 90.00
_cell_volume                      2104.8(2)
_cell_formula_units_Z             4
_cell_measurement_temperature     183(2)
_cell_measurement_reflns_used     ?
_cell_measurement_theta_min       ?
_cell_measurement_theta_max       ?

_exptl_crystal_description        block
_exptl_crystal_colour             colorless
_exptl_crystal_size_max           0.27
_exptl_crystal_size_mid           0.20
_exptl_crystal_size_min           0.12
_exptl_crystal_density_meas       ?
_exptl_crystal_density_diffrn     1.364
_exptl_crystal_density_method     'not measured'
_exptl_crystal_F_000              912
_exptl_absorpt_coefficient_mu     0.817
_exptl_absorpt_correction_type    'multi-scans'
_exptl_absorpt_correction_T_min   0.790339
_exptl_absorpt_correction_T_max   0.930069
_exptl_absorpt_process_details    'Bruker SADABS'

_exptl_special_details
;
 ?
;

_diffrn_ambient_temperature       183(2)
_diffrn_radiation_wavelength      0.71073
_diffrn_radiation_type            MoK\a
_diffrn_radiation_source          'fine-focus sealed tube'
_diffrn_radiation_monochromator   graphite
_diffrn_measurement_device_type   'CCD area detector'
_diffrn_measurement_method        'phi and omega scans'
_diffrn_detector_area_resol_mean  ?
_diffrn_standards_number          ?
_diffrn_standards_interval_count  ?
_diffrn_standards_interval_time   ?
_diffrn_standards_decay_%         ?
_diffrn_reflns_number             8215
_diffrn_reflns_av_R_equivalents   0.0190
_diffrn_reflns_av_sigmaI/netI     0.0179
_diffrn_reflns_limit_h_min        -11
_diffrn_reflns_limit_h_max        10
_diffrn_reflns_limit_k_min        -14
_diffrn_reflns_limit_k_max        9
_diffrn_reflns_limit_l_min        -13
_diffrn_reflns_limit_l_max        17
_diffrn_reflns_theta_min          2.54
_diffrn_reflns_theta_max          23.29
_reflns_number_total              3026
_reflns_number_gt                 2732
_reflns_threshold_expression      >2sigma(I)

_computing_data_collection        'Bruker SMART'
_computing_cell_refinement        'Bruker SMART'
_computing_data_reduction         'Bruker SHELXTL'
_computing_structure_solution     'SHELXS-97 (Sheldrick, 1990)'
_computing_structure_refinement   'SHELXL-97 (Sheldrick, 1997)'
_computing_molecular_graphics     'Bruker SHELXTL'
_computing_publication_material   'Bruker SHELXTL'

_refine_special_details
;
 Refinement of F^2^ against ALL reflections.  The weighted R-factor wR
and
 goodness of fit S are based on F^2^, conventional R-factors R are based

 on F, with F set to zero for negative F^2^. The threshold expression of

 F^2^ > 2sigma(F^2^) is used only for calculating R-factors(gt) etc. and
is
 not relevant to the choice of reflections for refinement.  R-factors
based
 on F^2^ are statistically about twice as large as those based on F, and
R-
 factors based on ALL data will be even larger.
;

_refine_ls_structure_factor_coef  Fsqd
_refine_ls_matrix_type            full
_refine_ls_weighting_scheme       calc
_refine_ls_weighting_details
 'calc w=1/[\s^2^(Fo^2^)+(0.0237P)^2^+1.4596P] where P=(Fo^2^+2Fc^2^)/3'

_atom_sites_solution_primary      direct
_atom_sites_solution_secondary    difmap
_atom_sites_solution_hydrogens    geom
_refine_ls_hydrogen_treatment     mixed
_refine_ls_extinction_method      none
_refine_ls_extinction_coef        ?
_refine_ls_extinction_expression
 'Fc^*^=kFc[1+0.001xFc^2^\l^3^/sin(2\q)]^-1/4^'
_refine_ls_number_reflns          3026
_refine_ls_number_parameters      234
_refine_ls_number_restraints      0
_refine_ls_R_factor_all           0.0235
_refine_ls_R_factor_gt            0.0203
_refine_ls_wR_factor_ref          0.0507
_refine_ls_wR_factor_gt           0.0495
_refine_ls_goodness_of_fit_ref    1.028
_refine_ls_restrained_S_all       1.028
_refine_ls_shift/su_max           0.002
_refine_ls_shift/su_mean          0.000

loop_
 _atom_site_label
 _atom_site_type_symbol
 _atom_site_fract_x
 _atom_site_fract_y
 _atom_site_fract_z
 _atom_site_U_iso_or_equiv
 _atom_site_adp_type
 _atom_site_occupancy
 _atom_site_symmetry_multiplicity
 _atom_site_calc_flag
 _atom_site_refinement_flags
 _atom_site_disorder_assembly
 _atom_site_disorder_group
Rh1 Rh 0.859489(16) 0.622457(13) 0.226860(11) 0.02424(9) Uani 1 1 d . .
.
N1 N 0.70132(17) 0.57703(13) 0.08992(11) 0.0228(4) Uani 1 1 d . . .
N2 N 0.60115(18) 0.76379(14) 0.06413(12) 0.0257(4) Uani 1 1 d . . .
B1 B 0.6454(2) 0.6746(2) 0.11354(17) 0.0234(6) Uani 1 1 d . . .
C3 C 0.6398(2) 0.65435(18) 0.20850(15) 0.0283(5) Uani 1 1 d . . .
H3 H 0.6036 0.7021 0.2452 0.034 Uiso 1 1 calc R . .
C4 C 0.6677(2) 0.55272(18) 0.22854(15) 0.0302(5) Uani 1 1 d . . .
H4 H 0.6496 0.5156 0.2792 0.036 Uiso 1 1 calc R . .
C5 C 0.7182(2) 0.51096(17) 0.16275(14) 0.0272(5) Uani 1 1 d . . .
H5 H 0.7408 0.4383 0.1605 0.033 Uiso 1 1 calc R . .
C6 C 0.7400(2) 0.54161(17) 0.00976(15) 0.0266(5) Uani 1 1 d . . .
C7 C 0.6165(2) 0.5422(2) -0.06985(15) 0.0346(6) Uani 1 1 d . . .
H7A H 0.5702 0.6066 -0.0726 0.052 Uiso 1 1 calc R . .
H7B H 0.5562 0.4878 -0.0638 0.052 Uiso 1 1 calc R . .
H7C H 0.6440 0.5325 -0.1240 0.052 Uiso 1 1 calc R . .
C8 C 0.8556(2) 0.60559(18) -0.00307(17) 0.0328(6) Uani 1 1 d . . .
H8A H 0.9360 0.5924 0.0451 0.049 Uiso 1 1 calc R . .
H8B H 0.8321 0.6768 -0.0030 0.049 Uiso 1 1 calc R . .
H8C H 0.8726 0.5885 -0.0595 0.049 Uiso 1 1 calc R . .
C9 C 0.7903(3) 0.43326(19) 0.02042(17) 0.0391(6) Uani 1 1 d . . .
H9A H 0.7192 0.3891 0.0283 0.059 Uiso 1 1 calc R . .
H9B H 0.8678 0.4284 0.0721 0.059 Uiso 1 1 calc R . .
H9C H 0.8163 0.4129 -0.0323 0.059 Uiso 1 1 calc R . .
C10 C 0.6167(2) 0.79063(18) -0.02316(15) 0.0305(5) Uani 1 1 d . . .
H10 H 0.6588 0.7315 -0.0440 0.037 Uiso 1 1 calc R . .
C11 C 0.7105(3) 0.8793(2) -0.0201(2) 0.0469(7) Uani 1 1 d . . .
H11A H 0.7959 0.8660 0.0235 0.070 Uiso 1 1 calc R . .
H11B H 0.6704 0.9401 -0.0034 0.070 Uiso 1 1 calc R . .
H11C H 0.7255 0.8887 -0.0783 0.070 Uiso 1 1 calc R . .
C12 C 0.4820(2) 0.8076(2) -0.09115(16) 0.0415(7) Uani 1 1 d . . .
H12A H 0.4394 0.8677 -0.0753 0.062 Uiso 1 1 calc R . .
H12B H 0.4243 0.7493 -0.0920 0.062 Uiso 1 1 calc R . .
H12C H 0.4961 0.8166 -0.1496 0.062 Uiso 1 1 calc R . .
C13 C 0.5352(2) 0.84443(18) 0.10202(16) 0.0321(6) Uani 1 1 d . . .
H13 H 0.5104 0.8973 0.0554 0.039 Uiso 1 1 calc R . .
C14 C 0.4039(2) 0.8104(2) 0.11821(18) 0.0429(7) Uani 1 1 d . . .
H14A H 0.4215 0.7571 0.1627 0.064 Uiso 1 1 calc R . .
H14B H 0.3443 0.7850 0.0631 0.064 Uiso 1 1 calc R . .
H14C H 0.3615 0.8674 0.1392 0.064 Uiso 1 1 calc R . .
C15 C 0.6281(3) 0.89631(19) 0.18250(17) 0.0423(7) Uani 1 1 d . . .
H15A H 0.7086 0.9197 0.1677 0.063 Uiso 1 1 calc R . .
H15B H 0.6531 0.8487 0.2316 0.063 Uiso 1 1 calc R . .
H15C H 0.5819 0.9537 0.1996 0.063 Uiso 1 1 calc R . .
C16 C 0.9700(2) 0.75740(18) 0.23217(17) 0.0361(6) Uani 1 1 d . . .
H16 H 0.9169 0.8145 0.1990 0.043 Uiso 1 1 calc R . .
C17 C 0.9489(2) 0.74015(17) 0.31470(16) 0.0340(6) Uani 1 1 d . . .
H17 H 0.8834 0.7871 0.3298 0.041 Uiso 1 1 calc R . .
C18 C 1.0574(3) 0.7033(2) 0.39378(17) 0.0431(7) Uani 1 1 d . . .
H18A H 1.0433 0.7332 0.4480 0.052 Uiso 1 1 calc R . .
H18B H 1.1452 0.7263 0.3884 0.052 Uiso 1 1 calc R . .
C19 C 1.0592(3) 0.5898(2) 0.40222(17) 0.0451(7) Uani 1 1 d . . .
H19A H 1.1517 0.5677 0.4308 0.054 Uiso 1 1 calc R . .
H19B H 1.0031 0.5700 0.4410 0.054 Uiso 1 1 calc R . .
C20 C 1.0094(2) 0.53644(19) 0.31484(17) 0.0367(6) Uani 1 1 d . . .
H20 H 0.9844 0.4647 0.3200 0.044 Uiso 1 1 calc R . .
C21 C 1.0513(2) 0.55750(19) 0.23948(17) 0.0360(6) Uani 1 1 d . . .
H21 H 1.0501 0.4982 0.2004 0.043 Uiso 1 1 calc R . .
C22 C 1.1580(2) 0.6348(2) 0.23756(19) 0.0439(7) Uani 1 1 d . . .
H22A H 1.2083 0.6121 0.1961 0.053 Uiso 1 1 calc R . .
H22B H 1.2216 0.6393 0.2969 0.053 Uiso 1 1 calc R . .
C23 C 1.1002(3) 0.7386(2) 0.2098(2) 0.0478(7) Uani 1 1 d . . .
H23A H 1.1660 0.7900 0.2392 0.057 Uiso 1 1 calc R . .
H23B H 1.0855 0.7461 0.1453 0.057 Uiso 1 1 calc R . .

loop_
 _atom_site_aniso_label
 _atom_site_aniso_U_11
 _atom_site_aniso_U_22
 _atom_site_aniso_U_33
 _atom_site_aniso_U_23
 _atom_site_aniso_U_13
 _atom_site_aniso_U_12
Rh1 0.02337(12) 0.02170(12) 0.02451(12) -0.00081(8) 0.00120(8)
-0.00010(8)
N1 0.0210(9) 0.0244(10) 0.0221(10) -0.0014(8) 0.0044(8) -0.0022(8)
N2 0.0261(10) 0.0278(11) 0.0231(10) -0.0005(8) 0.0067(8) 0.0034(8)
B1 0.0160(12) 0.0281(14) 0.0255(14) -0.0036(11) 0.0046(11) -0.0021(11)
C3 0.0229(12) 0.0345(14) 0.0280(13) -0.0013(10) 0.0078(10) 0.0000(10)
C4 0.0278(12) 0.0367(14) 0.0258(13) 0.0052(11) 0.0066(10) -0.0086(11)
C5 0.0262(12) 0.0231(12) 0.0284(13) 0.0029(10) 0.0010(10) -0.0046(10)
C6 0.0251(12) 0.0300(13) 0.0256(12) -0.0048(10) 0.0085(10) -0.0003(10)
C7 0.0321(13) 0.0447(15) 0.0261(13) -0.0077(11) 0.0062(11) -0.0059(12)
C8 0.0249(12) 0.0372(14) 0.0387(14) -0.0003(11) 0.0125(11) -0.0001(11)
C9 0.0441(15) 0.0332(14) 0.0427(15) -0.0083(12) 0.0164(13) 0.0010(12)
C10 0.0305(13) 0.0321(13) 0.0285(13) 0.0064(11) 0.0074(10) 0.0046(11)
C11 0.0424(16) 0.0451(17) 0.0545(18) 0.0148(14) 0.0153(14) -0.0014(13)
C12 0.0361(14) 0.0566(18) 0.0300(14) 0.0063(13) 0.0060(11) 0.0112(13)
C13 0.0317(13) 0.0293(13) 0.0322(13) -0.0031(11) 0.0033(11) 0.0068(11)
C14 0.0317(14) 0.0486(17) 0.0487(16) -0.0098(13) 0.0116(12) 0.0103(12)
C15 0.0465(16) 0.0348(15) 0.0408(16) -0.0099(12) 0.0038(13) 0.0060(12)
C16 0.0322(13) 0.0230(13) 0.0469(16) 0.0000(12) 0.0004(12) -0.0045(11)
C17 0.0333(14) 0.0227(13) 0.0386(15) -0.0096(11) -0.0027(11) 0.0004(10)
C18 0.0423(15) 0.0403(16) 0.0367(15) -0.0120(12) -0.0065(12) 0.0045(13)
C19 0.0455(16) 0.0441(16) 0.0342(15) 0.0016(12) -0.0085(12) 0.0079(13)
C20 0.0338(14) 0.0249(13) 0.0422(16) 0.0019(11) -0.0052(12) 0.0070(11)
C21 0.0246(13) 0.0350(14) 0.0420(15) -0.0104(12) -0.0015(11) 0.0076(11)
C22 0.0270(13) 0.0533(18) 0.0481(16) -0.0121(14) 0.0045(12) -0.0004(12)
C23 0.0351(15) 0.0488(17) 0.0578(18) -0.0025(14) 0.0098(13) -0.0138(13)

_geom_special_details
;
 All esds (except the esd in the dihedral angle between two l.s. planes)

 are estimated using the full covariance matrix.  The cell esds are
taken
 into account individually in the estimation of esds in distances,
angles
 and torsion angles; correlations between esds in cell parameters are
only
 used when they are defined by crystal symmetry.  An approximate
(isotropic)
 treatment of cell esds is used for estimating esds involving l.s.
planes.
;

loop_
 _geom_bond_atom_site_label_1
 _geom_bond_atom_site_label_2
 _geom_bond_distance
 _geom_bond_site_symmetry_2
 _geom_bond_publ_flag
Rh1 C20 2.120(2) . ?
Rh1 C16 2.124(2) . ?
Rh1 C17 2.131(2) . ?
Rh1 C21 2.135(2) . ?
Rh1 C5 2.141(2) . ?
Rh1 C4 2.209(2) . ?
Rh1 C3 2.266(2) . ?
Rh1 N1 2.4084(17) . ?
Rh1 B1 2.544(2) . ?
N1 C5 1.419(3) . ?
N1 C6 1.504(3) . ?
N1 B1 1.513(3) . ?
N2 B1 1.427(3) . ?
N2 C10 1.473(3) . ?
N2 C13 1.486(3) . ?
B1 C3 1.538(3) . ?
C3 C4 1.403(3) . ?
C4 C5 1.400(3) . ?
C6 C9 1.530(3) . ?
C6 C7 1.533(3) . ?
C6 C8 1.533(3) . ?
C10 C11 1.525(3) . ?
C10 C12 1.532(3) . ?
C13 C14 1.527(3) . ?
C13 C15 1.534(3) . ?
C16 C17 1.397(4) . ?
C16 C23 1.512(4) . ?
C17 C18 1.518(3) . ?
C18 C19 1.518(4) . ?
C19 C20 1.511(4) . ?
C20 C21 1.401(4) . ?
C21 C22 1.522(4) . ?
C22 C23 1.524(4) . ?

loop_
 _geom_angle_atom_site_label_1
 _geom_angle_atom_site_label_2
 _geom_angle_atom_site_label_3
 _geom_angle
 _geom_angle_site_symmetry_1
 _geom_angle_site_symmetry_3
 _geom_angle_publ_flag
C20 Rh1 C16 97.92(10) . . ?
C20 Rh1 C17 81.93(9) . . ?
C16 Rh1 C17 38.33(10) . . ?
C20 Rh1 C21 38.46(10) . . ?
C16 Rh1 C21 81.76(10) . . ?
C17 Rh1 C21 90.37(9) . . ?
C20 Rh1 C5 102.83(9) . . ?
C16 Rh1 C5 154.33(9) . . ?
C17 Rh1 C5 160.02(9) . . ?
C21 Rh1 C5 105.50(9) . . ?
C20 Rh1 C4 105.74(9) . . ?
C16 Rh1 C4 146.86(9) . . ?
C17 Rh1 C4 122.52(9) . . ?
C21 Rh1 C4 130.82(10) . . ?
C5 Rh1 C4 37.51(9) . . ?
C20 Rh1 C3 136.25(9) . . ?
C16 Rh1 C3 111.31(9) . . ?
C17 Rh1 C3 101.04(9) . . ?
C21 Rh1 C3 166.81(9) . . ?
C5 Rh1 C3 61.98(9) . . ?
C4 Rh1 C3 36.51(9) . . ?
C20 Rh1 N1 130.70(8) . . ?
C16 Rh1 N1 118.60(8) . . ?
C17 Rh1 N1 146.96(8) . . ?
C21 Rh1 N1 112.02(8) . . ?
C5 Rh1 N1 35.75(7) . . ?
C4 Rh1 N1 60.39(7) . . ?
C3 Rh1 N1 60.87(7) . . ?
C20 Rh1 B1 162.77(9) . . ?
C16 Rh1 B1 99.08(9) . . ?
C17 Rh1 B1 113.51(9) . . ?
C21 Rh1 B1 142.57(9) . . ?
C5 Rh1 B1 60.03(8) . . ?
C4 Rh1 B1 60.12(8) . . ?
C3 Rh1 B1 36.73(8) . . ?
N1 Rh1 B1 35.43(7) . . ?
C5 N1 C6 118.88(18) . . ?
C5 N1 B1 107.77(17) . . ?
C6 N1 B1 133.34(18) . . ?
C5 N1 Rh1 61.78(11) . . ?
C6 N1 Rh1 123.93(13) . . ?
B1 N1 Rh1 77.18(11) . . ?
B1 N2 C10 127.67(18) . . ?
B1 N2 C13 119.91(18) . . ?
C10 N2 C13 112.38(18) . . ?
N2 B1 N1 132.1(2) . . ?
N2 B1 C3 125.8(2) . . ?
N1 B1 C3 102.01(19) . . ?
N2 B1 Rh1 134.57(16) . . ?
N1 B1 Rh1 67.39(11) . . ?
C3 B1 Rh1 61.78(12) . . ?
C4 C3 B1 109.2(2) . . ?
C4 C3 Rh1 69.53(13) . . ?
B1 C3 Rh1 81.48(13) . . ?
C5 C4 C3 108.3(2) . . ?
C5 C4 Rh1 68.58(12) . . ?
C3 C4 Rh1 73.96(13) . . ?
C4 C5 N1 111.4(2) . . ?
C4 C5 Rh1 73.91(13) . . ?
N1 C5 Rh1 82.47(12) . . ?
N1 C6 C9 111.49(19) . . ?
N1 C6 C7 109.24(17) . . ?
C9 C6 C7 106.3(2) . . ?
N1 C6 C8 109.66(18) . . ?
C9 C6 C8 106.37(19) . . ?
C7 C6 C8 113.76(19) . . ?
N2 C10 C11 113.0(2) . . ?
N2 C10 C12 112.13(19) . . ?
C11 C10 C12 111.4(2) . . ?
N2 C13 C14 112.7(2) . . ?
N2 C13 C15 113.72(19) . . ?
C14 C13 C15 112.7(2) . . ?
C17 C16 C23 124.7(2) . . ?
C17 C16 Rh1 71.09(14) . . ?
C23 C16 Rh1 111.16(17) . . ?
C16 C17 C18 123.2(2) . . ?
C16 C17 Rh1 70.58(13) . . ?
C18 C17 Rh1 113.00(16) . . ?
C17 C18 C19 112.6(2) . . ?
C20 C19 C18 113.3(2) . . ?
C21 C20 C19 124.8(2) . . ?
C21 C20 Rh1 71.38(14) . . ?
C19 C20 Rh1 110.54(16) . . ?
C20 C21 C22 123.4(2) . . ?
C20 C21 Rh1 70.17(13) . . ?
C22 C21 Rh1 113.15(17) . . ?
C21 C22 C23 112.8(2) . . ?
C16 C23 C22 113.1(2) . . ?

loop_
 _geom_torsion_atom_site_label_1
 _geom_torsion_atom_site_label_2
 _geom_torsion_atom_site_label_3
 _geom_torsion_atom_site_label_4
 _geom_torsion
 _geom_torsion_site_symmetry_1
 _geom_torsion_site_symmetry_2
 _geom_torsion_site_symmetry_3
 _geom_torsion_site_symmetry_4
 _geom_torsion_publ_flag
C20 Rh1 N1 C5 46.11(17) . . . . ?
C16 Rh1 N1 C5 178.63(14) . . . . ?
C17 Rh1 N1 C5 -144.54(17) . . . . ?
C21 Rh1 N1 C5 86.09(14) . . . . ?
C4 Rh1 N1 C5 -39.45(14) . . . . ?
C3 Rh1 N1 C5 -81.58(14) . . . . ?
B1 Rh1 N1 C5 -118.52(17) . . . . ?
C20 Rh1 N1 C6 -61.32(19) . . . . ?
C16 Rh1 N1 C6 71.19(18) . . . . ?
C17 Rh1 N1 C6 108.0(2) . . . . ?
C21 Rh1 N1 C6 -21.35(18) . . . . ?
C5 Rh1 N1 C6 -107.4(2) . . . . ?
C4 Rh1 N1 C6 -146.89(18) . . . . ?
C3 Rh1 N1 C6 170.98(18) . . . . ?
B1 Rh1 N1 C6 134.0(2) . . . . ?
C20 Rh1 N1 B1 164.63(14) . . . . ?
C16 Rh1 N1 B1 -62.85(14) . . . . ?
C17 Rh1 N1 B1 -26.0(2) . . . . ?
C21 Rh1 N1 B1 -155.40(13) . . . . ?
C5 Rh1 N1 B1 118.52(17) . . . . ?
C4 Rh1 N1 B1 79.06(13) . . . . ?
C3 Rh1 N1 B1 36.93(12) . . . . ?
C10 N2 B1 N1 -9.8(4) . . . . ?
C13 N2 B1 N1 172.7(2) . . . . ?
C10 N2 B1 C3 173.4(2) . . . . ?
C13 N2 B1 C3 -4.1(3) . . . . ?
C10 N2 B1 Rh1 89.5(3) . . . . ?
C13 N2 B1 Rh1 -87.9(3) . . . . ?
C5 N1 B1 N2 -175.2(2) . . . . ?
C6 N1 B1 N2 5.5(4) . . . . ?
Rh1 N1 B1 N2 130.4(2) . . . . ?
C5 N1 B1 C3 2.1(2) . . . . ?
C6 N1 B1 C3 -177.2(2) . . . . ?
Rh1 N1 B1 C3 -52.25(13) . . . . ?
C5 N1 B1 Rh1 54.39(13) . . . . ?
C6 N1 B1 Rh1 -124.9(2) . . . . ?
C20 Rh1 B1 N2 -170.3(3) . . . . ?
C16 Rh1 B1 N2 0.2(2) . . . . ?
C17 Rh1 B1 N2 37.3(2) . . . . ?
C21 Rh1 B1 N2 -88.1(3) . . . . ?
C5 Rh1 B1 N2 -163.9(3) . . . . ?
C4 Rh1 B1 N2 152.6(3) . . . . ?
C3 Rh1 B1 N2 113.8(3) . . . . ?
N1 Rh1 B1 N2 -127.5(3) . . . . ?
C20 Rh1 B1 N1 -42.7(4) . . . . ?
C16 Rh1 B1 N1 127.70(13) . . . . ?
C17 Rh1 B1 N1 164.88(12) . . . . ?
C21 Rh1 B1 N1 39.4(2) . . . . ?
C5 Rh1 B1 N1 -36.34(12) . . . . ?
C4 Rh1 B1 N1 -79.90(13) . . . . ?
C3 Rh1 B1 N1 -118.64(18) . . . . ?
C20 Rh1 B1 C3 75.9(3) . . . . ?
C16 Rh1 B1 C3 -113.65(14) . . . . ?
C17 Rh1 B1 C3 -76.48(15) . . . . ?
C21 Rh1 B1 C3 158.07(15) . . . . ?
C5 Rh1 B1 C3 82.30(15) . . . . ?
C4 Rh1 B1 C3 38.74(14) . . . . ?
N1 Rh1 B1 C3 118.64(18) . . . . ?
N2 B1 C3 C4 168.7(2) . . . . ?
N1 B1 C3 C4 -8.8(2) . . . . ?
Rh1 B1 C3 C4 -64.76(15) . . . . ?
N2 B1 C3 Rh1 -126.5(2) . . . . ?
N1 B1 C3 Rh1 55.93(14) . . . . ?
C20 Rh1 C3 C4 -41.24(19) . . . . ?
C16 Rh1 C3 C4 -169.65(14) . . . . ?
C17 Rh1 C3 C4 -131.07(14) . . . . ?
C21 Rh1 C3 C4 18.4(5) . . . . ?
C5 Rh1 C3 C4 37.69(13) . . . . ?
N1 Rh1 C3 C4 78.59(14) . . . . ?
B1 Rh1 C3 C4 114.21(19) . . . . ?
C20 Rh1 C3 B1 -155.45(14) . . . . ?
C16 Rh1 C3 B1 76.14(15) . . . . ?
C17 Rh1 C3 B1 114.72(14) . . . . ?
C21 Rh1 C3 B1 -95.8(4) . . . . ?
C5 Rh1 C3 B1 -76.52(14) . . . . ?
C4 Rh1 C3 B1 -114.21(19) . . . . ?
N1 Rh1 C3 B1 -35.63(12) . . . . ?
B1 C3 C4 C5 12.4(3) . . . . ?
Rh1 C3 C4 C5 -60.32(15) . . . . ?
B1 C3 C4 Rh1 72.72(15) . . . . ?
C20 Rh1 C4 C5 -90.68(15) . . . . ?
C16 Rh1 C4 C5 135.42(18) . . . . ?
C17 Rh1 C4 C5 178.93(13) . . . . ?
C21 Rh1 C4 C5 -56.95(17) . . . . ?
C3 Rh1 C4 C5 117.59(19) . . . . ?
N1 Rh1 C4 C5 37.57(12) . . . . ?
B1 Rh1 C4 C5 78.60(14) . . . . ?
C20 Rh1 C4 C3 151.73(14) . . . . ?
C16 Rh1 C4 C3 17.8(2) . . . . ?
C17 Rh1 C4 C3 61.35(16) . . . . ?
C21 Rh1 C4 C3 -174.54(14) . . . . ?
C5 Rh1 C4 C3 -117.59(19) . . . . ?
N1 Rh1 C4 C3 -80.02(14) . . . . ?
B1 Rh1 C4 C3 -38.98(13) . . . . ?
C3 C4 C5 N1 -11.2(3) . . . . ?
Rh1 C4 C5 N1 -74.97(15) . . . . ?
C3 C4 C5 Rh1 63.76(16) . . . . ?
C6 N1 C5 C4 -175.30(18) . . . . ?
B1 N1 C5 C4 5.3(2) . . . . ?
Rh1 N1 C5 C4 69.40(16) . . . . ?
C6 N1 C5 Rh1 115.31(16) . . . . ?
B1 N1 C5 Rh1 -64.12(14) . . . . ?
C20 Rh1 C5 C4 99.21(15) . . . . ?
C16 Rh1 C5 C4 -117.7(2) . . . . ?
C17 Rh1 C5 C4 -2.6(3) . . . . ?
C21 Rh1 C5 C4 138.83(14) . . . . ?
C3 Rh1 C5 C4 -36.68(13) . . . . ?
N1 Rh1 C5 C4 -114.87(19) . . . . ?
B1 Rh1 C5 C4 -78.85(14) . . . . ?
C20 Rh1 C5 N1 -145.92(13) . . . . ?
C16 Rh1 C5 N1 -2.8(3) . . . . ?
C17 Rh1 C5 N1 112.2(3) . . . . ?
C21 Rh1 C5 N1 -106.30(13) . . . . ?
C4 Rh1 C5 N1 114.87(19) . . . . ?
C3 Rh1 C5 N1 78.19(13) . . . . ?
B1 Rh1 C5 N1 36.02(11) . . . . ?
C5 N1 C6 C9 1.6(3) . . . . ?
B1 N1 C6 C9 -179.2(2) . . . . ?
Rh1 N1 C6 C9 75.3(2) . . . . ?
C5 N1 C6 C7 118.7(2) . . . . ?
B1 N1 C6 C7 -62.0(3) . . . . ?
Rh1 N1 C6 C7 -167.51(15) . . . . ?
C5 N1 C6 C8 -116.0(2) . . . . ?
B1 N1 C6 C8 63.3(3) . . . . ?
Rh1 N1 C6 C8 -42.2(2) . . . . ?
B1 N2 C10 C11 -112.6(3) . . . . ?
C13 N2 C10 C11 65.0(2) . . . . ?
B1 N2 C10 C12 120.5(2) . . . . ?
C13 N2 C10 C12 -61.9(3) . . . . ?
B1 N2 C13 C14 -63.2(3) . . . . ?
C10 N2 C13 C14 119.0(2) . . . . ?
B1 N2 C13 C15 66.7(3) . . . . ?
C10 N2 C13 C15 -111.1(2) . . . . ?
C20 Rh1 C16 C17 -66.15(16) . . . . ?
C21 Rh1 C16 C17 -101.16(15) . . . . ?
C5 Rh1 C16 C17 150.0(2) . . . . ?
C4 Rh1 C16 C17 69.4(2) . . . . ?
C3 Rh1 C16 C17 80.68(15) . . . . ?
N1 Rh1 C16 C17 148.20(13) . . . . ?
B1 Rh1 C16 C17 116.70(14) . . . . ?
C20 Rh1 C16 C23 54.7(2) . . . . ?
C17 Rh1 C16 C23 120.9(3) . . . . ?
C21 Rh1 C16 C23 19.71(19) . . . . ?
C5 Rh1 C16 C23 -89.1(3) . . . . ?
C4 Rh1 C16 C23 -169.72(17) . . . . ?
C3 Rh1 C16 C23 -158.44(17) . . . . ?
N1 Rh1 C16 C23 -90.93(19) . . . . ?
B1 Rh1 C16 C23 -122.42(19) . . . . ?
C23 C16 C17 C18 2.2(4) . . . . ?
Rh1 C16 C17 C18 105.3(2) . . . . ?
C23 C16 C17 Rh1 -103.1(2) . . . . ?
C20 Rh1 C17 C16 113.80(16) . . . . ?
C21 Rh1 C17 C16 76.16(15) . . . . ?
C5 Rh1 C17 C16 -140.7(2) . . . . ?
C4 Rh1 C17 C16 -142.64(14) . . . . ?
C3 Rh1 C17 C16 -110.50(15) . . . . ?
N1 Rh1 C17 C16 -58.1(2) . . . . ?
B1 Rh1 C17 C16 -74.16(16) . . . . ?
C20 Rh1 C17 C18 -4.94(19) . . . . ?
C16 Rh1 C17 C18 -118.7(3) . . . . ?
C21 Rh1 C17 C18 -42.6(2) . . . . ?
C5 Rh1 C17 C18 100.5(3) . . . . ?
C4 Rh1 C17 C18 98.6(2) . . . . ?
C3 Rh1 C17 C18 130.76(19) . . . . ?
N1 Rh1 C17 C18 -176.80(15) . . . . ?
B1 Rh1 C17 C18 167.09(17) . . . . ?
C16 C17 C18 C19 -92.5(3) . . . . ?
Rh1 C17 C18 C19 -11.4(3) . . . . ?
C17 C18 C19 C20 29.0(3) . . . . ?
C18 C19 C20 C21 48.5(4) . . . . ?
C18 C19 C20 Rh1 -32.6(3) . . . . ?
C16 Rh1 C20 C21 -65.94(16) . . . . ?
C17 Rh1 C20 C21 -100.89(16) . . . . ?
C5 Rh1 C20 C21 98.85(15) . . . . ?
C4 Rh1 C20 C21 137.50(15) . . . . ?
C3 Rh1 C20 C21 161.55(14) . . . . ?
N1 Rh1 C20 C21 73.27(17) . . . . ?
B1 Rh1 C20 C21 104.5(3) . . . . ?
C16 Rh1 C20 C19 55.2(2) . . . . ?
C17 Rh1 C20 C19 20.2(2) . . . . ?
C21 Rh1 C20 C19 121.1(3) . . . . ?
C5 Rh1 C20 C19 -140.06(19) . . . . ?
C4 Rh1 C20 C19 -101.4(2) . . . . ?
C3 Rh1 C20 C19 -77.4(2) . . . . ?
N1 Rh1 C20 C19 -165.64(16) . . . . ?
B1 Rh1 C20 C19 -134.4(3) . . . . ?
C19 C20 C21 C22 2.7(4) . . . . ?
Rh1 C20 C21 C22 105.2(2) . . . . ?
C19 C20 C21 Rh1 -102.5(2) . . . . ?
C16 Rh1 C21 C20 113.96(16) . . . . ?
C17 Rh1 C21 C20 76.48(15) . . . . ?
C5 Rh1 C21 C20 -91.23(15) . . . . ?
C4 Rh1 C21 C20 -59.24(18) . . . . ?
C3 Rh1 C21 C20 -73.6(4) . . . . ?
N1 Rh1 C21 C20 -128.45(14) . . . . ?
B1 Rh1 C21 C20 -151.85(15) . . . . ?
C20 Rh1 C21 C22 -118.8(2) . . . . ?
C16 Rh1 C21 C22 -4.86(19) . . . . ?
C17 Rh1 C21 C22 -42.34(19) . . . . ?
C5 Rh1 C21 C22 149.95(18) . . . . ?
C4 Rh1 C21 C22 -178.06(16) . . . . ?
C3 Rh1 C21 C22 167.6(3) . . . . ?
N1 Rh1 C21 C22 112.73(18) . . . . ?
B1 Rh1 C21 C22 89.3(2) . . . . ?
C20 C21 C22 C23 -91.7(3) . . . . ?
Rh1 C21 C22 C23 -10.9(3) . . . . ?
C17 C16 C23 C22 49.6(3) . . . . ?
Rh1 C16 C23 C22 -31.5(3) . . . . ?
C21 C22 C23 C16 27.8(3) . . . . ?

_diffrn_measured_fraction_theta_max    0.996
_diffrn_reflns_theta_full              23.29
_diffrn_measured_fraction_theta_full   0.996
_refine_diff_density_max    0.226
_refine_diff_density_min   -0.187
_refine_diff_density_rms    0.045

#===END
